# Supplementary material for: Vitamin B12 Deficiency Induces Imbalance in Melanocytes Homeostasis—A Cellular Basis of Hypocobalaminemia Pigmentary Manifestations
Source: MDPI journal article supplement (doi:10.3390/ijms19092845), 2018-09-19
Supplement: s1 [file s1]

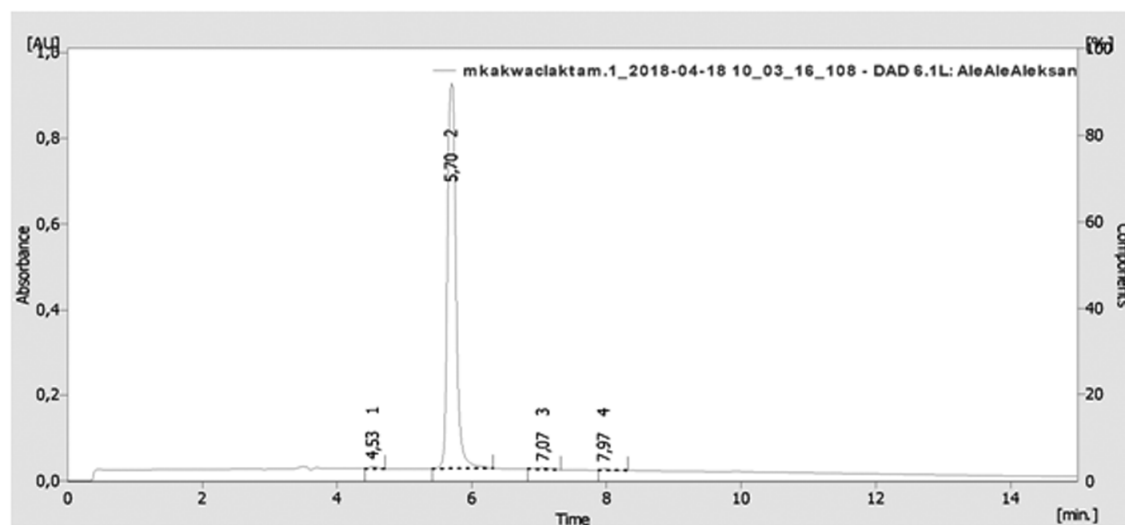

Result Table (Uncal - mkakwaciaktam.1\_2018-04-18 10\_03\_16\_108 - DAD 6.1L: AleAleAleksandra)

|       | Reten. Time<br>[min] | Area<br>[mAU.s] | Height<br>[mAU] | Area<br>[%] | Height<br>[%] | W05<br>[min] | PDA Peak<br>Purity | Compound<br>Name |
|-------|----------------------|-----------------|-----------------|-------------|---------------|--------------|--------------------|------------------|
| 1     | 4,533                | 38,075          | 5,540           | 0,5         | 0,6           | 0,12         | 972                |                  |
| 2     | 5,700                | 7946,831        | 899,631         | 98,7        | 98,6          | 0,15         | 350                |                  |
| 3     | 7,067                | 44,498          | 3,350           | 0,6         | 0,4           | 0,22         | 910                |                  |
| 4     | 7,967                | 20,092          | 4,045           | 0,2         | 0,4           | 0,08         | 910                |                  |
| Total |                      | 8049,496        | 912,566         | 100,0       | 100,0         |              |                    |                  |

Figure S1. Data from compound identification.
